# Supplementary material for: Retrotransposon activation contributes to neurodegeneration in a Drosophila TDP-43 model of ALS
Source: PLOS journal article supplement (doi:10.1371/journal.pgen.1006635), 2017-03-16

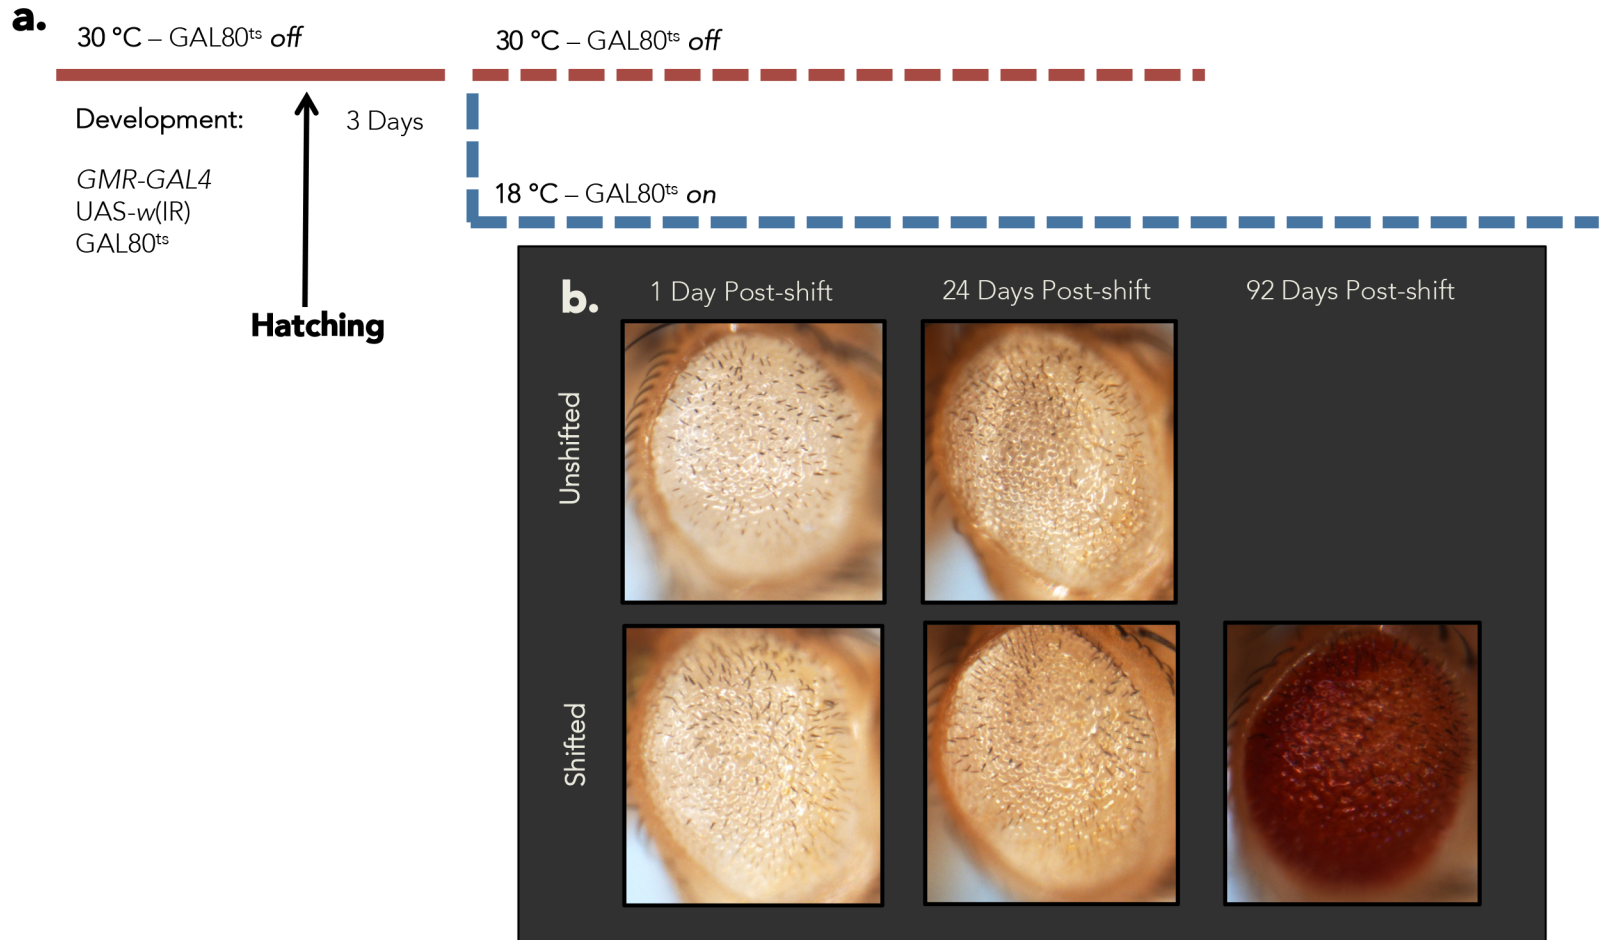

**c.1**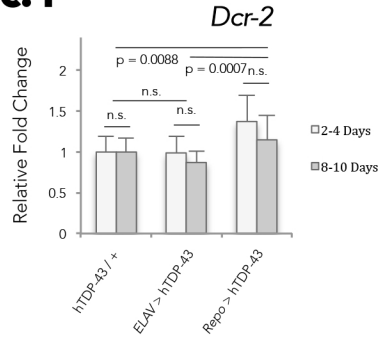**c.2**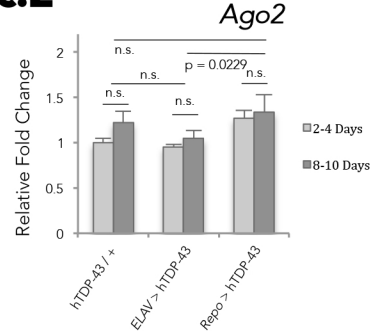**d.1****ELAV > hTDP-43**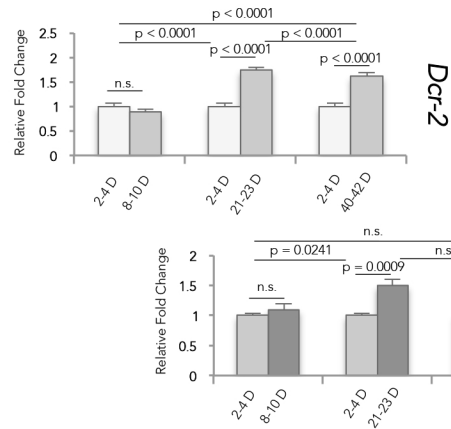**d.2****ELAV / +**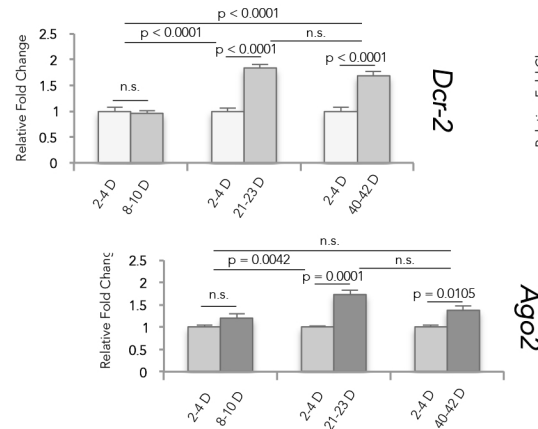**d.3****hTDP-43 / +**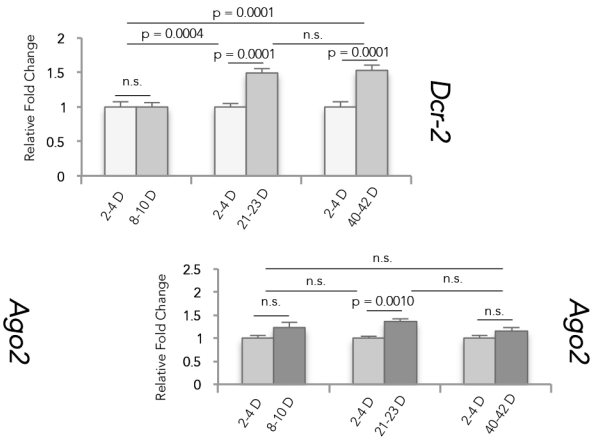

Supplement: S6 (10.1371/journal.pgen.1006635.s006) [file journal.pgen.1006635.s006]
